# Supplementary material
Source: PubMed Central journal article supplement (PMC3763851)

Electronic Supplementary Information for:

**Photocatalytic Conversion of CO<sub>2</sub> to CO using Rhenium Bipyridine Platforms Containing Ancillary Phenyl or BODIPY Moieties**

Gabriel A. Andrade,<sup>§</sup> Allen J. Pistner,<sup>§</sup> Glenn P.A. Yap,<sup>§</sup> Daniel A. Lutterman,<sup>\*†</sup> and Joel Rosenthal<sup>\*§</sup>

luttermanda@ornl.gov, joelr@udel.edu

<sup>§</sup>*Department of Chemistry and Biochemistry, University of Delaware, Newark, DE, 19716*

<sup>†</sup>*Chemical Sciences Division Oak Ridge National Laboratory, Oak Ridge, TN, 37831*

| <i>Index</i>       |                                                                                    | <i>Page</i> |
|--------------------|------------------------------------------------------------------------------------|-------------|
| <b>Figure S1</b>   | UV-Vis absorbance spectra of <b>12</b> and <b>8+13</b>                             | S2          |
| <b>Figure S2</b>   | Fully labeled thermal ellipsoid plot for the bromide homologue of complex <b>8</b> | S3          |
| <b>Table S1</b>    | Crystallographic data for the bromide homologue of complex <b>8</b>                | S4          |
| <b>Table S2</b>    | List of bond lengths (Å) for the bromide homologue of complex <b>8</b>             | S5–S6       |
| <b>Table S3</b>    | List of bond angles (°) for the bromide homologue of complex <b>8</b>              | S7–S9       |
| <b>NMR Spectra</b> | NMR Spectra for compounds <b>8</b> , <b>12</b> and <b>13</b>                       | S10–S15     |

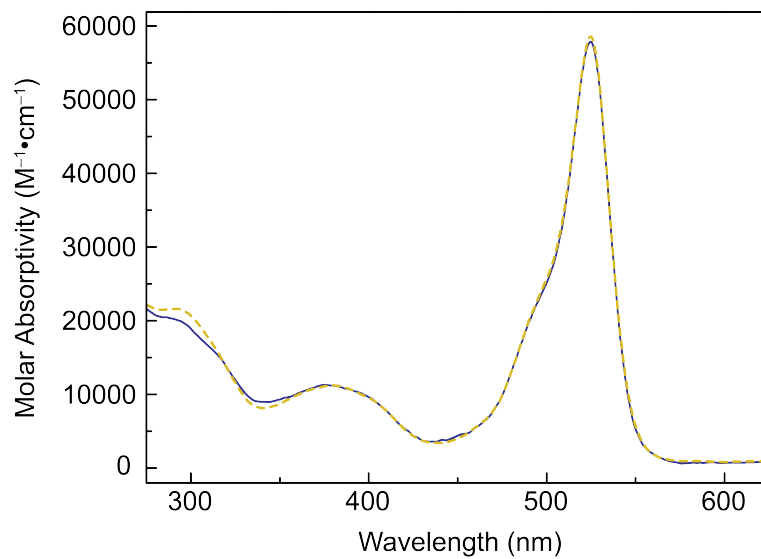

**Figure S1.** Overlay of the UV-vis absorption profile of complex **12** (blue) with the composite spectrum obtained for complexes **8** and **13** (gold dashed). Absorption data was recorded in DMF.

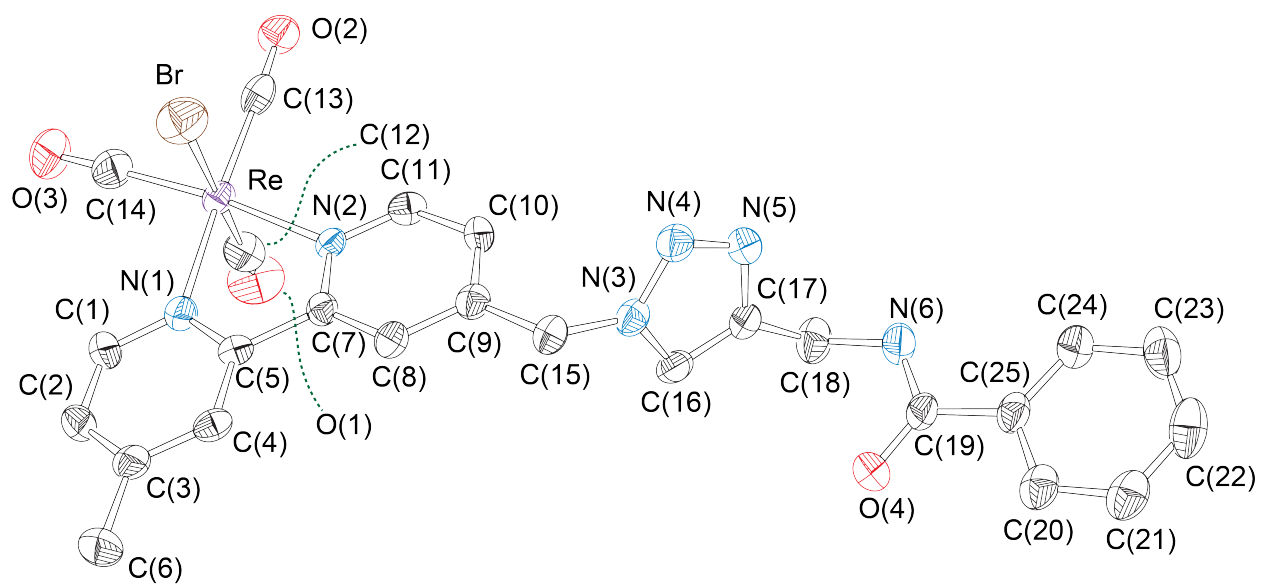

**Figure S2.** Fully labeled thermal ellipsoid plot for the bromide homologue of complex **8**. Ellipsoids are shown at the 50% probability level. Hydrogen atoms are removed for clarity.

**Table S1.** Crystallographic Data for the Bromide Homologue of Complex **8**.

|                           |                                                                    |
|---------------------------|--------------------------------------------------------------------|
| Formula                   | C <sub>25</sub> H <sub>20</sub> BrN <sub>6</sub> O <sub>4</sub> Re |
| <i>F</i> <sub>w</sub>     | 734.58                                                             |
| Crystal System            | Monoclinic                                                         |
| Space Group               | P 2 <sub>1</sub> /n                                                |
| <i>a</i>                  | 11.6786(9) Å                                                       |
| <i>b</i>                  | 19.4125(16) Å                                                      |
| <i>c</i>                  | 11.7398(9) Å                                                       |
| <i>α</i>                  | 90°                                                                |
| <i>β</i>                  | 104.9320(10)°                                                      |
| <i>γ</i>                  | 90°                                                                |
| <i>V</i>                  | 2571.7(4) Å <sup>3</sup>                                           |
| <i>Z</i>                  | 4                                                                  |
| Temp                      | 200(2) K                                                           |
| <i>D</i> <sub>calcd</sub> | 1.897 g/cm <sup>3</sup>                                            |
| 2 <i>θ</i> range          | 55.18°                                                             |
| <i>μ</i> (Mo Kα)          | 6.322 mm <sup>-1</sup>                                             |
| Relections                | 33556                                                              |
| Unique                    | 5946                                                               |
| <i>R</i> (int)            | 0.0587                                                             |
| <i>R</i> <sub>1</sub>     | 0.0495                                                             |
| <i>wR</i> <sub>2</sub>    | 0.1488                                                             |

**Table S2.** Bond lengths (Å) for the Bromide Homologue of complex **8**.

| <b>Atom1</b> | <b>Atom2</b> | <b>Length (Å)</b> |
|--------------|--------------|-------------------|
| Re           | C(14)        | 1.926(10)         |
| Re           | C(12)        | 1.933(10)         |
| Re           | C(13)        | 1.930(10)         |
| Re           | N(1)         | 2.171(7)          |
| Re           | N(2)         | 2.178(6)          |
| Re           | Br           | 2.5927(12)        |
| N(1)         | C(1)         | 1.339(10)         |
| N(1)         | C(5)         | 1.348(10)         |
| N(2)         | C(11)        | 1.345(10)         |
| N(2)         | C(7)         | 1.352(9)          |
| N(3)         | N(4)         | 1.322(10)         |
| N(3)         | C(16)        | 1.357(10)         |
| N(3)         | C(15)        | 1.447(10)         |
| N(4)         | N(5)         | 1.319(10)         |
| N(5)         | C(17)        | 1.341(11)         |
| N(6)         | C(19)        | 1.346(12)         |
| N(6)         | C(18)        | 1.472(11)         |
| N(6)         | H(6)         | 0.88(11)          |
| O(1)         | C(12)        | 1.103(12)         |
| O(2)         | C(13)        | 1.144(11)         |
| O(3)         | C(14)        | 1.143(12)         |
| O(4)         | C(19)        | 1.228(10)         |
| C(1)         | C(2)         | 1.364(12)         |
| C(1)         | H(1)         | 0.95              |
| C(2)         | C(3)         | 1.379(12)         |
| C(2)         | H(2)         | 0.95              |
| C(3)         | C(4)         | 1.374(12)         |
| C(3)         | C(6)         | 1.525(12)         |
| C(4)         | C(5)         | 1.394(10)         |
| C(4)         | H(4)         | 0.95              |
| C(5)         | C(7)         | 1.486(10)         |
| C(6)         | H(6A)        | 0.98              |
| C(6)         | H(6B)        | 0.98              |
| C(6)         | H(6C)        | 0.98              |
| C(7)         | C(8)         | 1.382(10)         |
| C(8)         | C(9)         | 1.398(11)         |
| C(8)         | H(8)         | 0.95              |
| C(9)         | C(10)        | 1.382(11)         |
| C(9)         | C(15)        | 1.509(11)         |
| C(10)        | C(11)        | 1.388(11)         |

|       |        |           |
|-------|--------|-----------|
| C(10) | H(10)  | 0.95      |
| C(11) | H(11)  | 0.95      |
| C(15) | H(15A) | 0.99      |
| C(15) | H(15B) | 0.99      |
| C(16) | C(17)  | 1.357(12) |
| C(16) | H(16)  | 0.95      |
| C(17) | C(18)  | 1.498(12) |
| C(18) | H(18A) | 0.99      |
| C(18) | H(18B) | 0.99      |
| C(19) | C(25)  | 1.499(11) |
| C(20) | C(21)  | 1.395(13) |
| C(20) | C(25)  | 1.392(13) |
| C(20) | H(20)  | 0.95      |
| C(21) | C(22)  | 1.340(15) |
| C(21) | H(21)  | 0.95      |
| C(22) | C(23)  | 1.382(15) |
| C(22) | H(22)  | 0.95      |
| C(23) | C(24)  | 1.395(14) |
| C(23) | H(23)  | 0.95      |
| C(24) | C(25)  | 1.389(13) |
| C(24) | H(24)  | 0.95      |

---

**Table S3.** Bond angles (°) for the Bromide Homologue of complex **8**.

| <b>Atom1</b> | <b>Atom2</b> | <b>Atom3</b> | <b>Angle (°)</b> |
|--------------|--------------|--------------|------------------|
| C(14)        | Re           | C(12)        | 89.4(4)          |
| C(14)        | Re           | C(13)        | 87.5(4)          |
| C(12)        | Re           | C(13)        | 90.7(4)          |
| C(14)        | Re           | N(1)         | 97.4(3)          |
| C(12)        | Re           | N(1)         | 94.2(3)          |
| C(13)        | Re           | N(1)         | 173.2(3)         |
| C(14)        | Re           | N(2)         | 170.5(3)         |
| C(12)        | Re           | N(2)         | 94.8(3)          |
| C(13)        | Re           | N(2)         | 100.9(3)         |
| N(1)         | Re           | N(2)         | 73.9(2)          |
| C(14)        | Re           | Br           | 91.2(3)          |
| C(12)        | Re           | Br           | 179.2(3)         |
| C(13)        | Re           | Br           | 89.9(2)          |
| N(1)         | Re           | Br           | 85.23(19)        |
| N(2)         | Re           | Br           | 84.54(16)        |
| C(1)         | N(1)         | C(5)         | 118.5(7)         |
| C(1)         | N(1)         | Re           | 123.5(6)         |
| C(5)         | N(1)         | Re           | 118.0(5)         |
| C(11)        | N(2)         | C(7)         | 118.6(6)         |
| C(11)        | N(2)         | Re           | 123.9(5)         |
| C(7)         | N(2)         | Re           | 117.4(5)         |
| N(4)         | N(3)         | C(16)        | 110.0(7)         |
| N(4)         | N(3)         | C(15)        | 120.7(7)         |
| C(16)        | N(3)         | C(15)        | 129.3(7)         |
| N(5)         | N(4)         | N(3)         | 107.7(7)         |
| N(4)         | N(5)         | C(17)        | 108.9(7)         |
| C(19)        | N(6)         | C(18)        | 119.7(8)         |
| C(19)        | N(6)         | H(6)         | 119(7)           |
| C(18)        | N(6)         | H(6)         | 121(7)           |
| N(1)         | C(1)         | C(2)         | 122.4(8)         |
| N(1)         | C(1)         | H(1)         | 118.8            |
| C(2)         | C(1)         | H(1)         | 118.8            |
| C(1)         | C(2)         | C(3)         | 120.0(8)         |
| C(1)         | C(2)         | H(2)         | 120              |
| C(3)         | C(2)         | H(2)         | 120              |
| C(4)         | C(3)         | C(2)         | 118.3(7)         |
| C(4)         | C(3)         | C(6)         | 121.6(8)         |
| C(2)         | C(3)         | C(6)         | 120.1(8)         |
| C(3)         | C(4)         | C(5)         | 119.4(7)         |
| C(3)         | C(4)         | H(4)         | 120.3            |

|        |       |        |           |
|--------|-------|--------|-----------|
| C(5)   | C(4)  | H(4)   | 120.3     |
| N(1)   | C(5)  | C(4)   | 121.4(7)  |
| N(1)   | C(5)  | C(7)   | 114.6(6)  |
| C(4)   | C(5)  | C(7)   | 124.0(7)  |
| C(3)   | C(6)  | H(6A)  | 109.5     |
| C(3)   | C(6)  | H(6B)  | 109.5     |
| H(6A)  | C(6)  | H(6B)  | 109.5     |
| C(3)   | C(6)  | H(6C)  | 109.5     |
| H(6A)  | C(6)  | H(6C)  | 109.5     |
| H(6B)  | C(6)  | H(6C)  | 109.5     |
| N(2)   | C(7)  | C(8)   | 121.9(7)  |
| N(2)   | C(7)  | C(5)   | 114.8(6)  |
| C(8)   | C(7)  | C(5)   | 123.3(7)  |
| C(9)   | C(8)  | C(7)   | 119.4(7)  |
| C(9)   | C(8)  | H(8)   | 120.3     |
| C(7)   | C(8)  | H(8)   | 120.3     |
| C(10)  | C(9)  | C(8)   | 118.5(7)  |
| C(10)  | C(9)  | C(15)  | 123.0(7)  |
| C(8)   | C(9)  | C(15)  | 118.4(7)  |
| C(9)   | C(10) | C(11)  | 119.2(7)  |
| C(9)   | C(10) | H(10)  | 120.4     |
| C(11)  | C(10) | H(10)  | 120.4     |
| N(2)   | C(11) | C(10)  | 122.4(7)  |
| N(2)   | C(11) | H(11)  | 118.8     |
| C(10)  | C(11) | H(11)  | 118.8     |
| O(1)   | C(12) | Re     | 177.3(10) |
| O(2)   | C(13) | Re     | 177.8(8)  |
| O(3)   | C(14) | Re     | 178.4(10) |
| N(3)   | C(15) | C(9)   | 113.5(7)  |
| N(3)   | C(15) | H(15A) | 108.9     |
| C(9)   | C(15) | H(15A) | 108.9     |
| N(3)   | C(15) | H(15B) | 108.9     |
| C(9)   | C(15) | H(15B) | 108.9     |
| H(15A) | C(15) | H(15B) | 107.7     |
| N(3)   | C(16) | C(17)  | 105.1(7)  |
| N(3)   | C(16) | H(16)  | 127.4     |
| C(17)  | C(16) | H(16)  | 127.4     |
| N(5)   | C(17) | C(16)  | 108.3(7)  |
| N(5)   | C(17) | C(18)  | 120.5(8)  |
| C(16)  | C(17) | C(18)  | 131.2(8)  |
| N(6)   | C(18) | C(17)  | 112.1(8)  |
| N(6)   | C(18) | H(18A) | 109.2     |
| C(17)  | C(18) | H(18A) | 109.2     |



|        |       |        |           |
|--------|-------|--------|-----------|
| N(6)   | C(18) | H(18B) | 109.2     |
| C(17)  | C(18) | H(18B) | 109.2     |
| H(18A) | C(18) | H(18B) | 107.9     |
| O(4)   | C(19) | N(6)   | 121.0(8)  |
| O(4)   | C(19) | C(25)  | 121.1(8)  |
| N(6)   | C(19) | C(25)  | 117.9(8)  |
| C(21)  | C(20) | C(25)  | 120.8(9)  |
| C(21)  | C(20) | H(20)  | 119.6     |
| C(25)  | C(20) | H(20)  | 119.6     |
| C(22)  | C(21) | C(20)  | 120.0(10) |
| C(22)  | C(21) | H(21)  | 120       |
| C(20)  | C(21) | H(21)  | 120       |
| C(21)  | C(22) | C(23)  | 120.9(9)  |
| C(21)  | C(22) | H(22)  | 119.5     |
| C(23)  | C(22) | H(22)  | 119.5     |
| C(22)  | C(23) | C(24)  | 119.9(10) |
| C(22)  | C(23) | H(23)  | 120       |
| C(24)  | C(23) | H(23)  | 120       |
| C(25)  | C(24) | C(23)  | 119.9(10) |
| C(25)  | C(24) | H(24)  | 120       |
| C(23)  | C(24) | H(24)  | 120       |
| C(24)  | C(25) | C(20)  | 118.5(8)  |
| C(24)  | C(25) | C(19)  | 124.6(8)  |
| C(20)  | C(25) | C(19)  | 116.9(8)  |

---

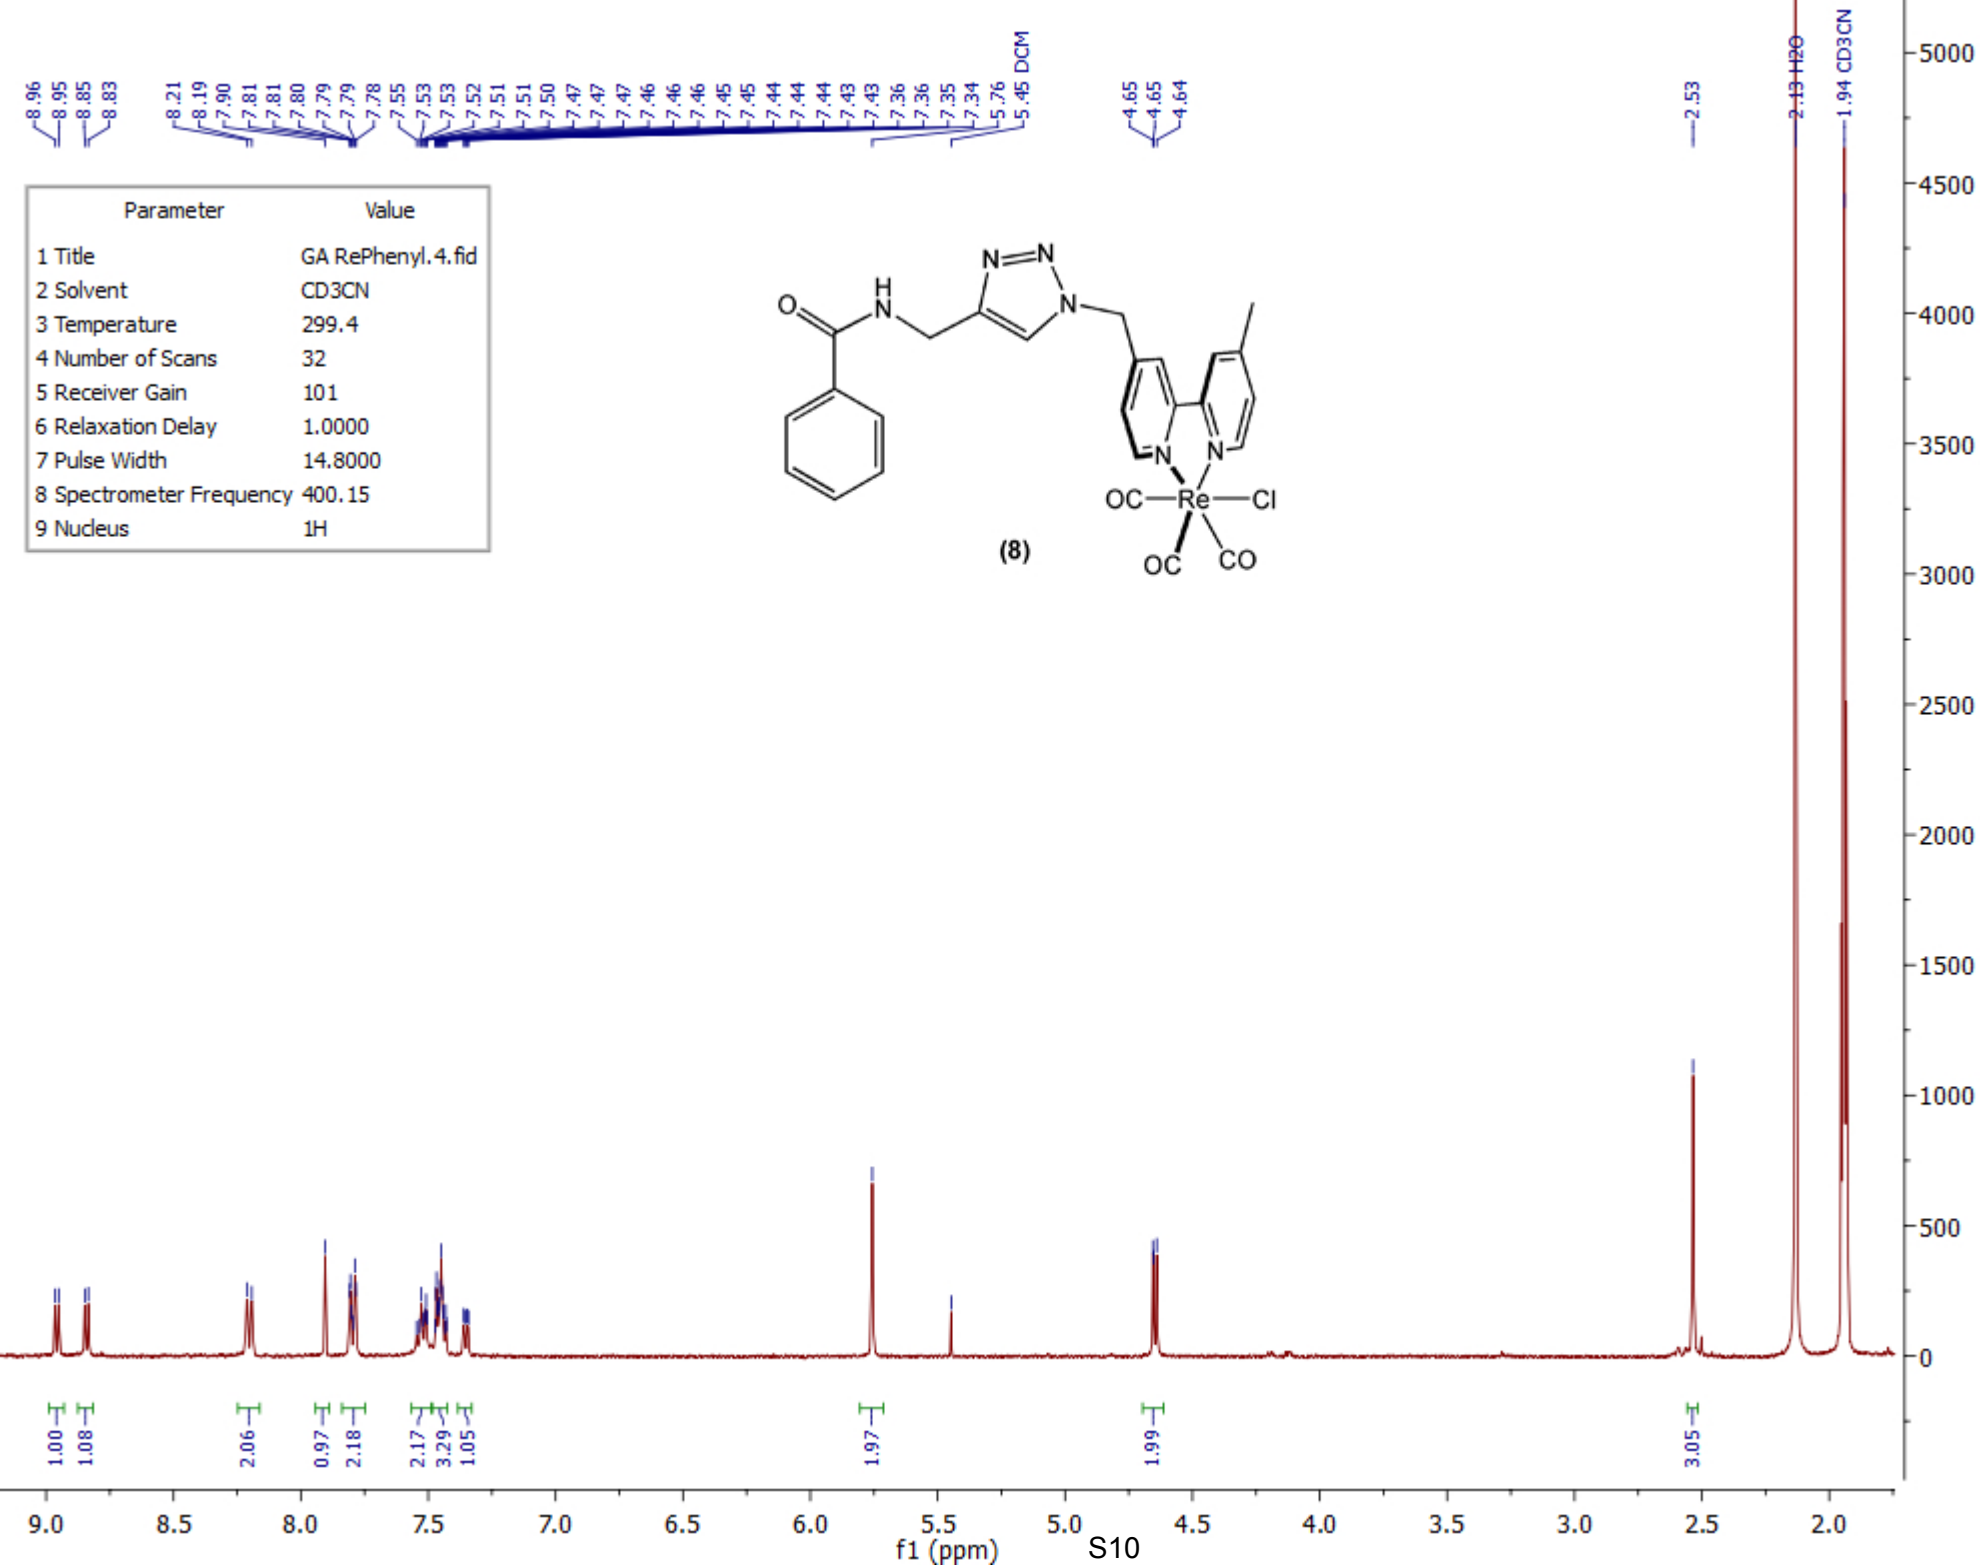

| Parameter                | Value             |
|--------------------------|-------------------|
| 1 Title                  | GA RePhenyl.2.fid |
| 2 Solvent                | CD3CN             |
| 3 Temperature            | 298.2             |
| 4 Number of Scans        | 32                |
| 5 Receiver Gain          | 512               |
| 6 Relaxation Delay       | 3.0000            |
| 7 Pulse Width            | 9.2500            |
| 8 Spectrometer Frequency | 100.62            |
| 9 Nucleus                | 13C               |

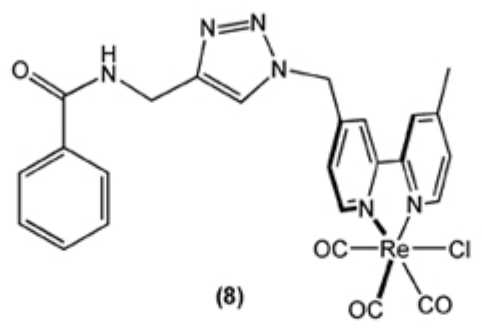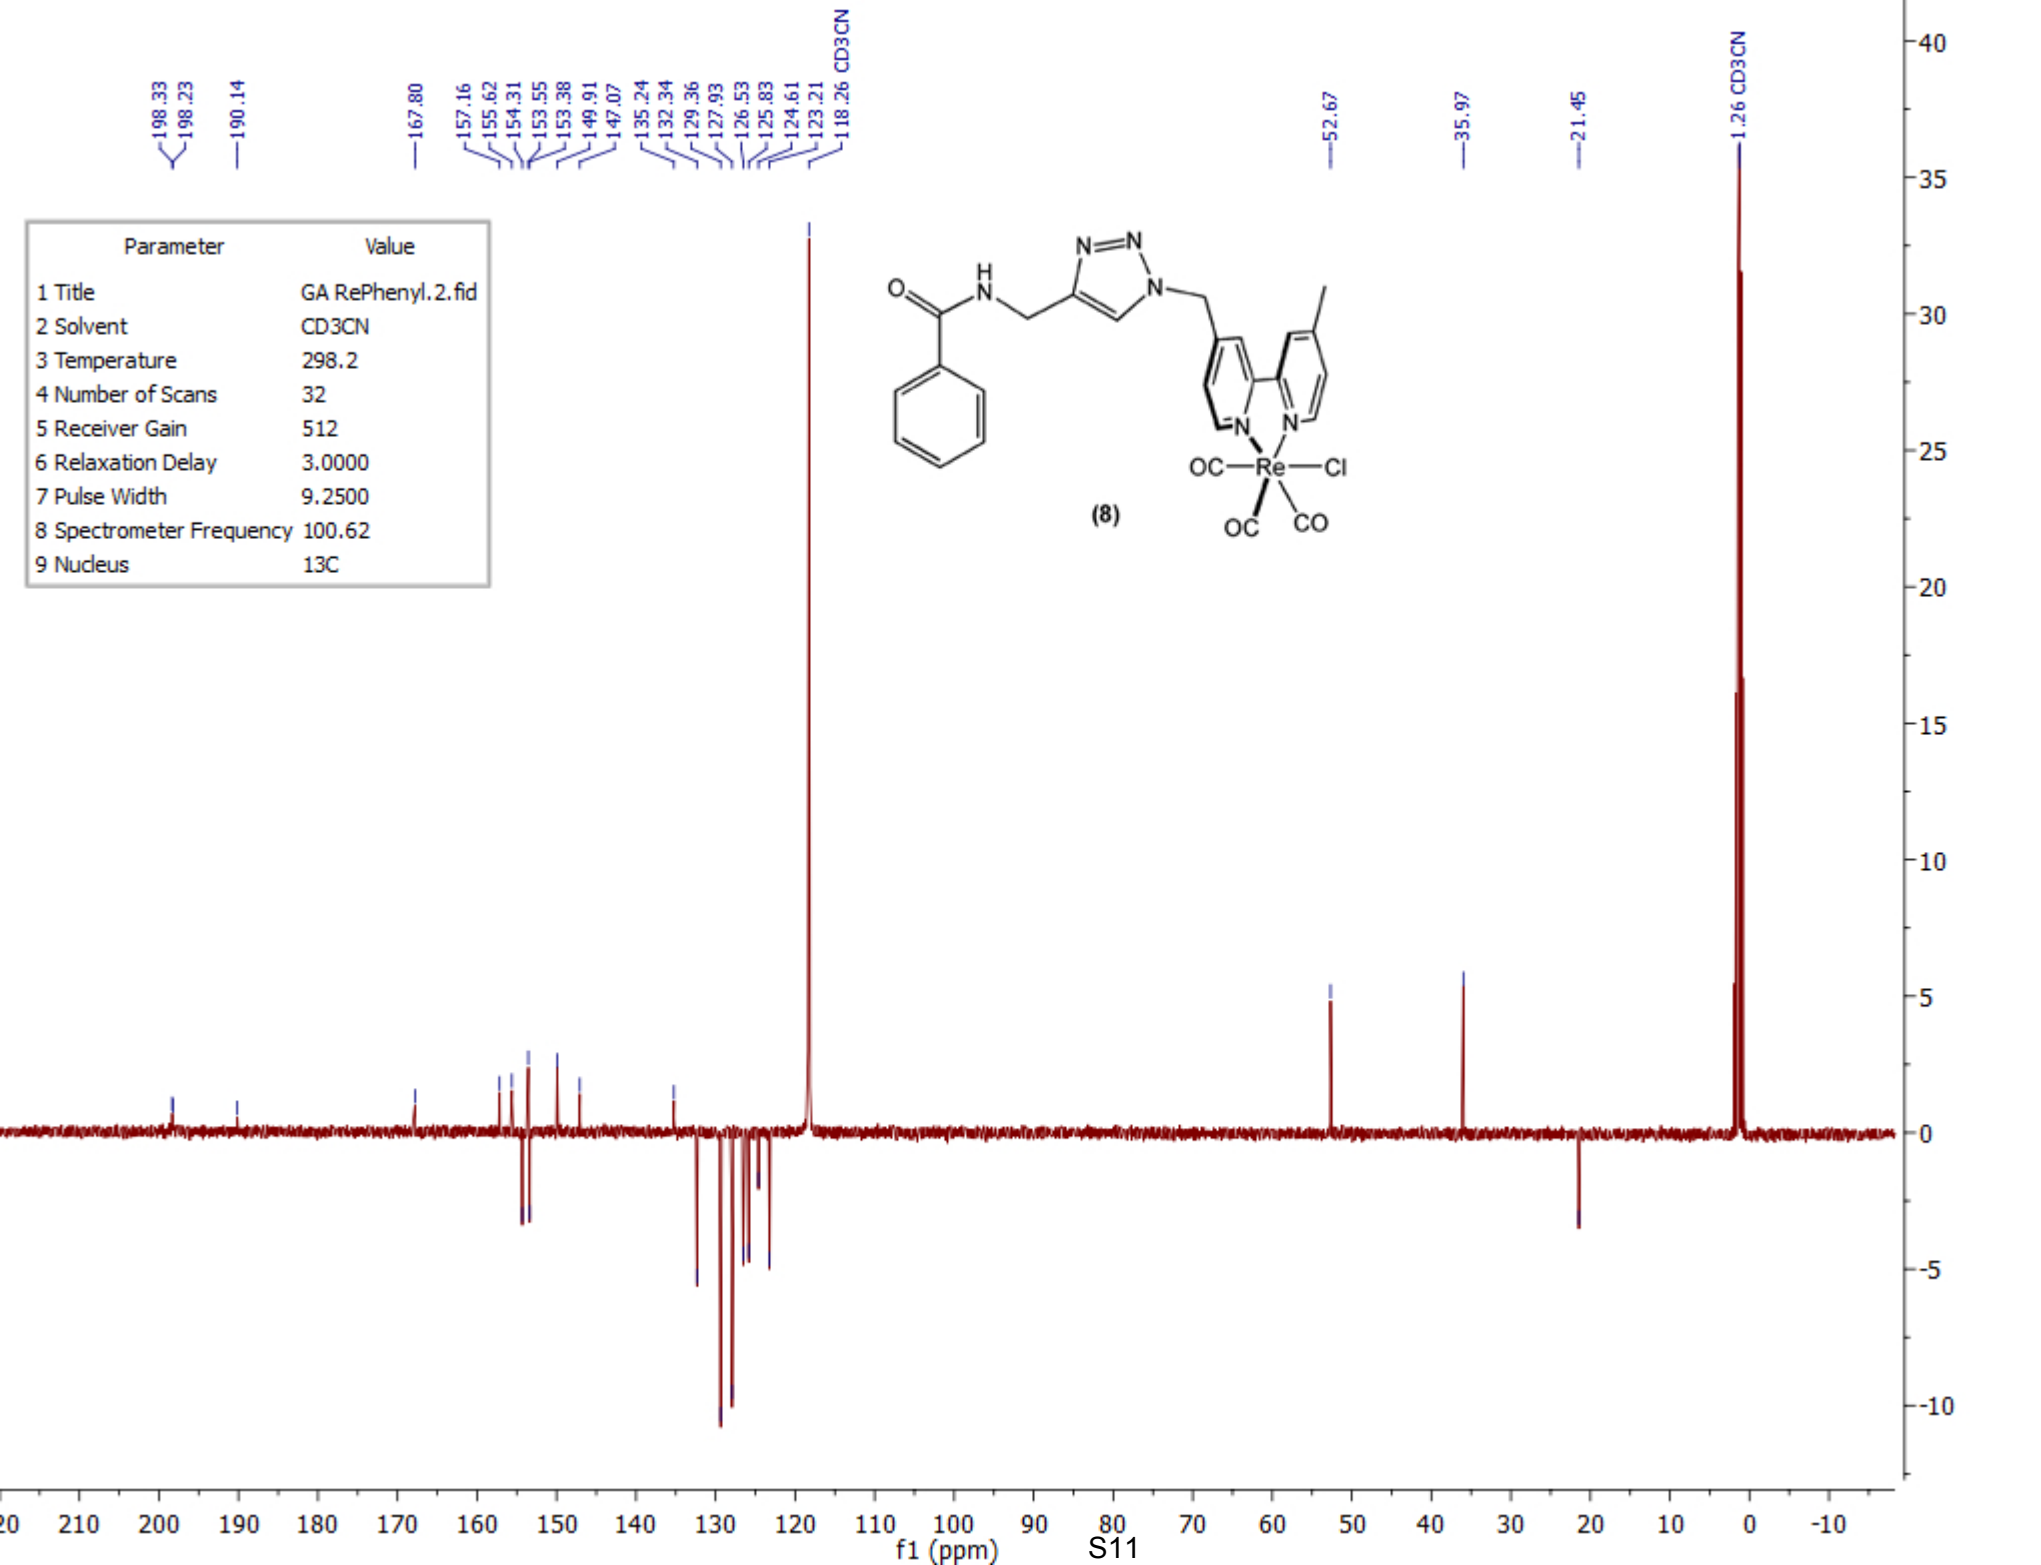

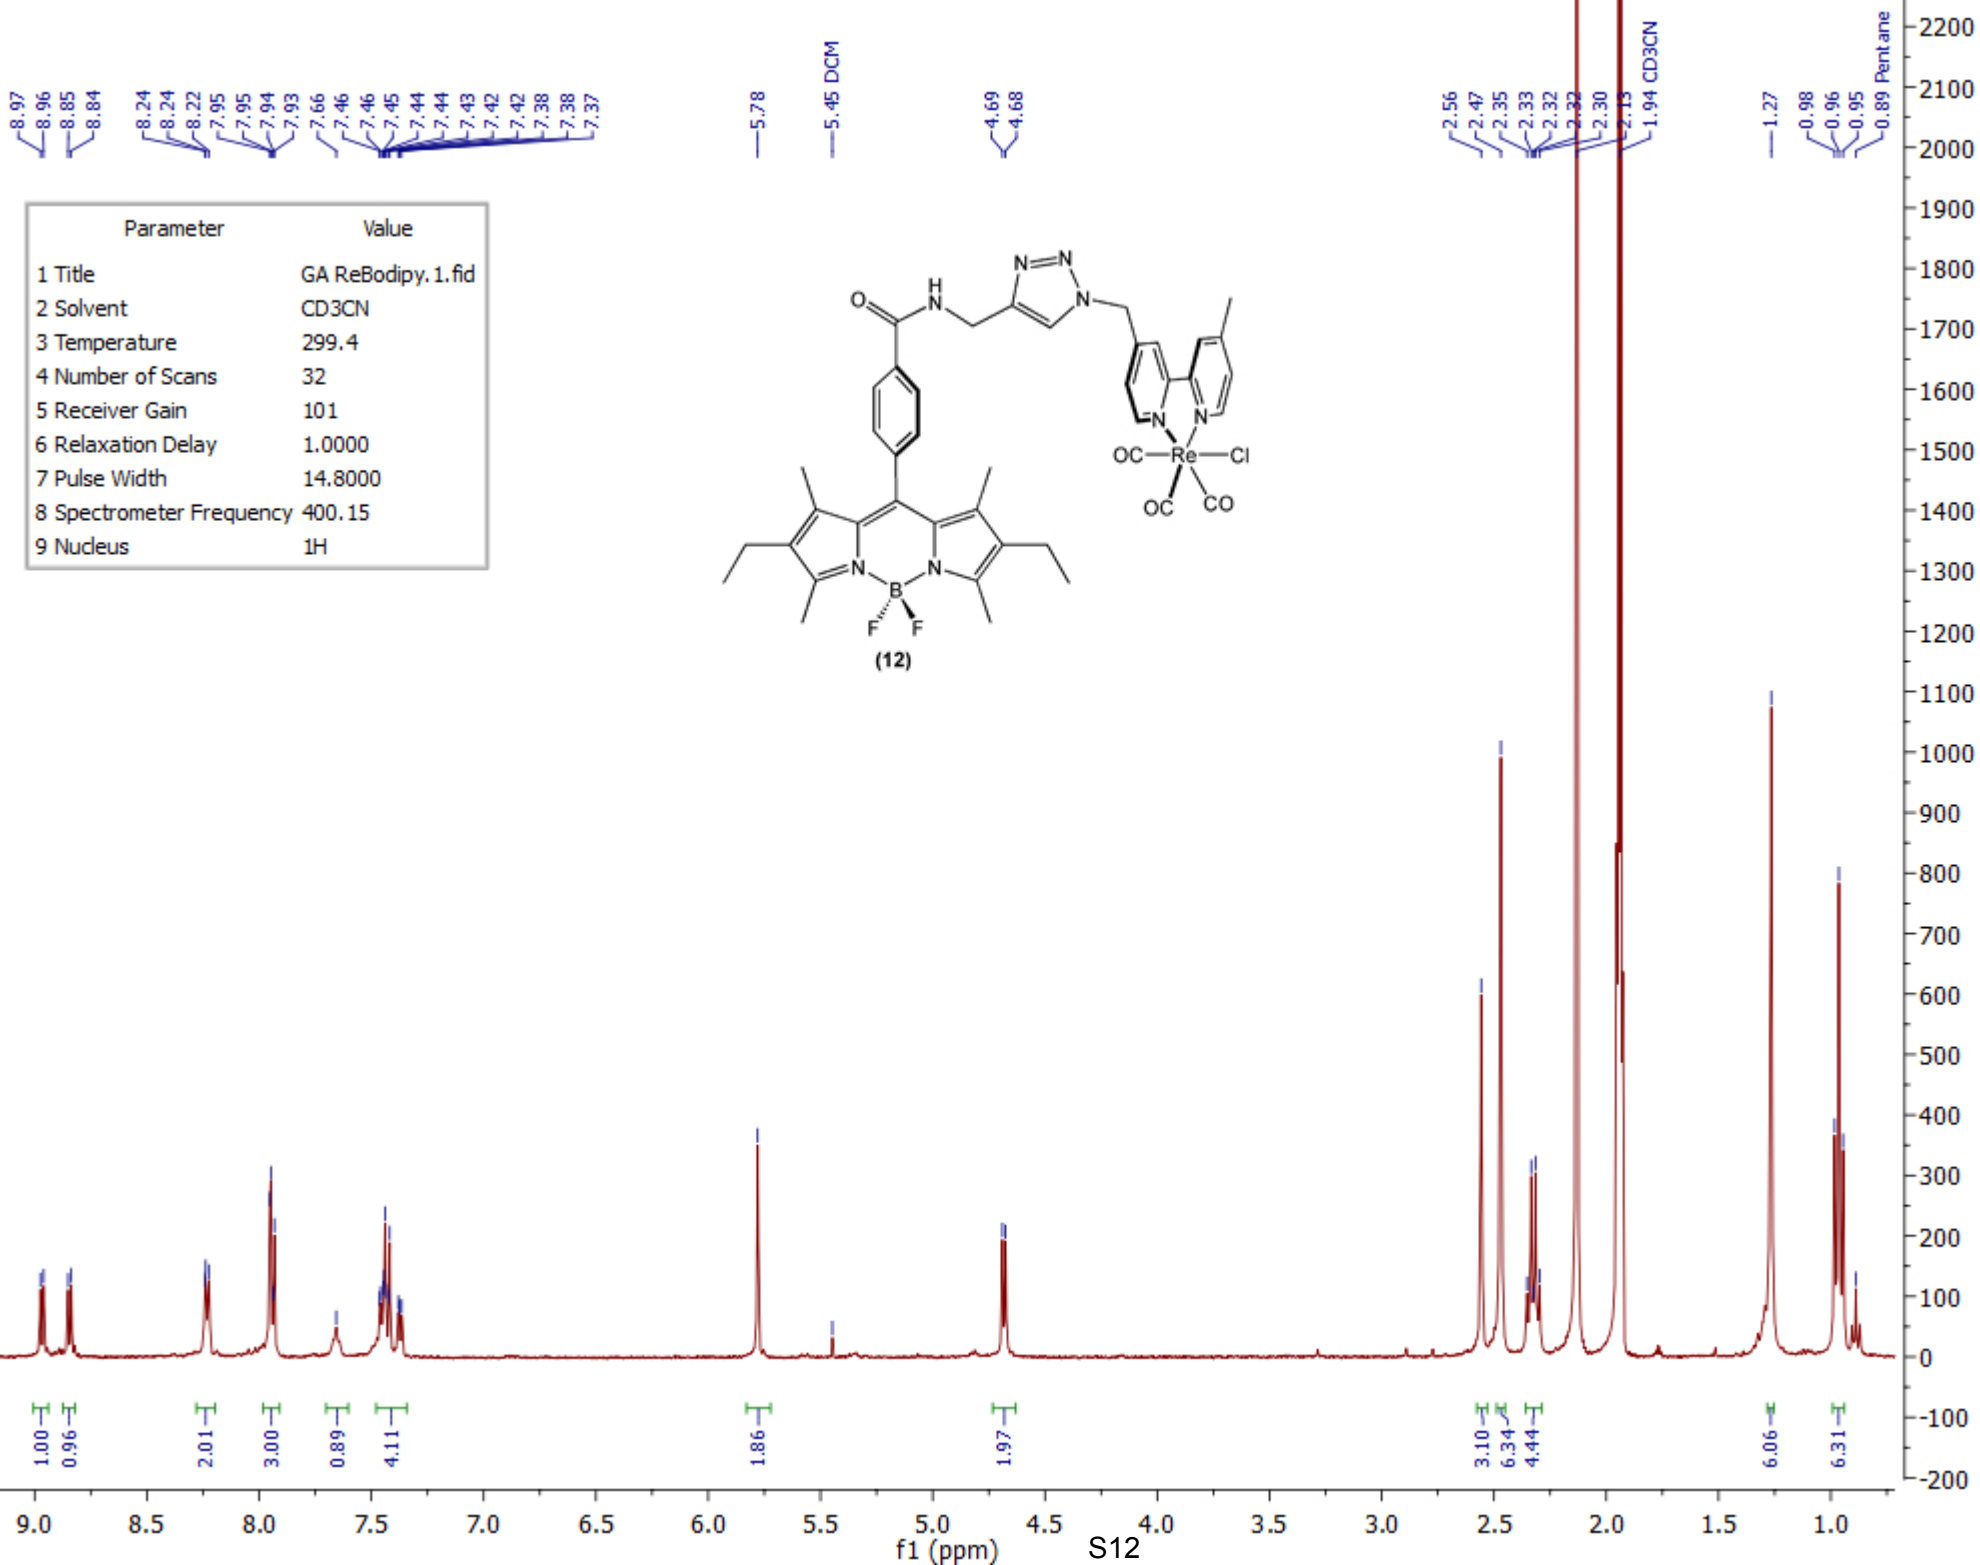

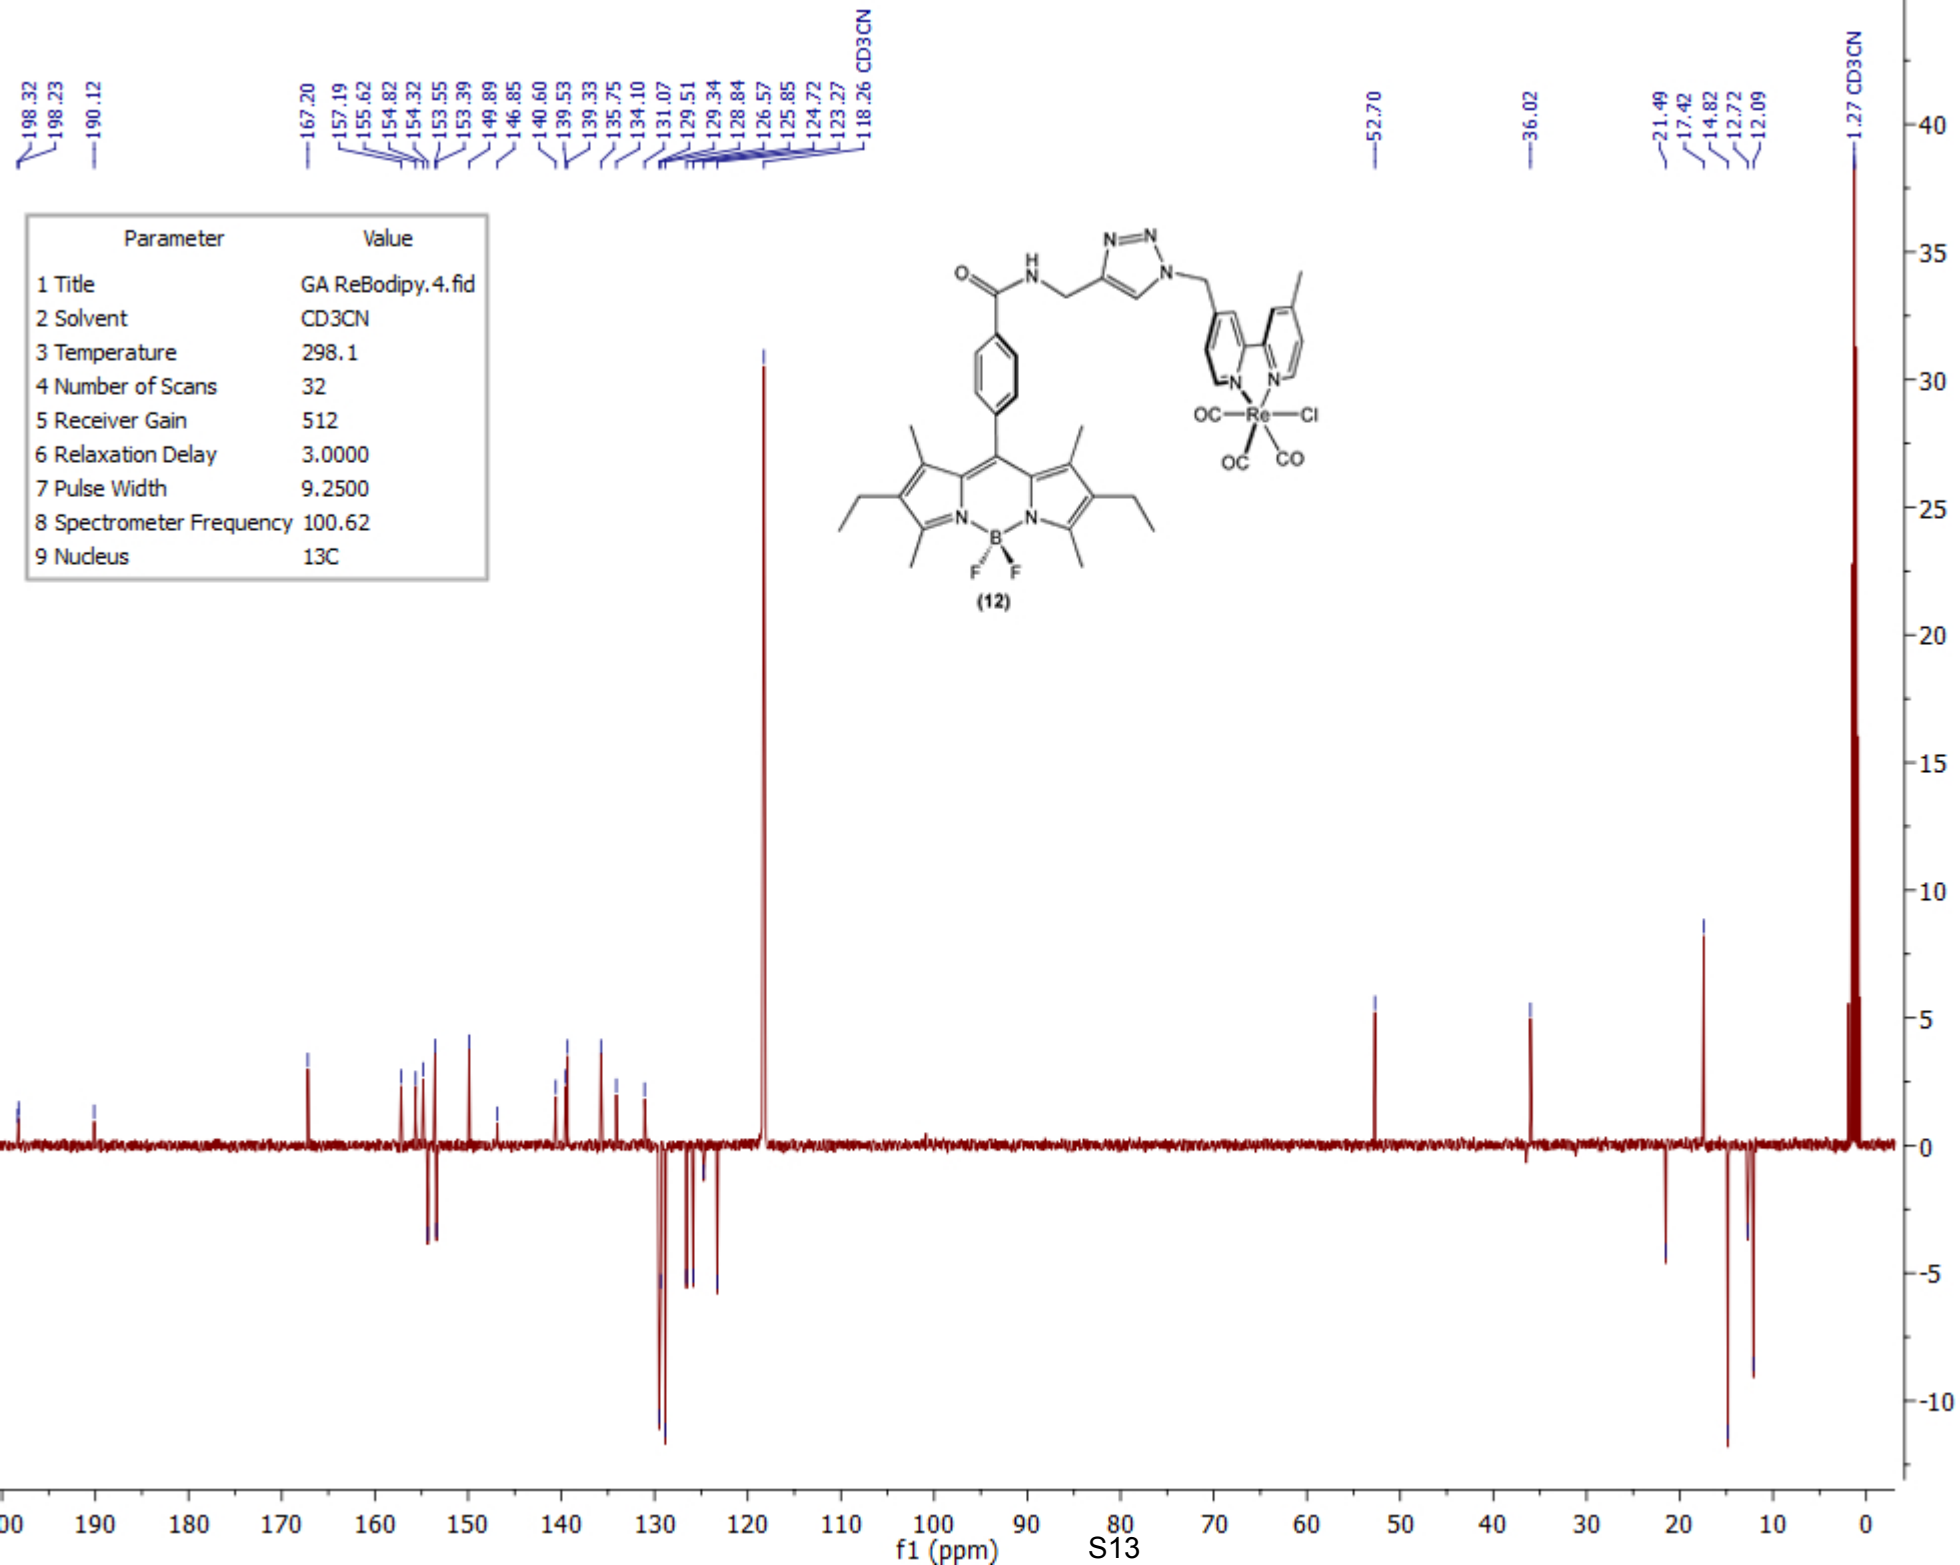

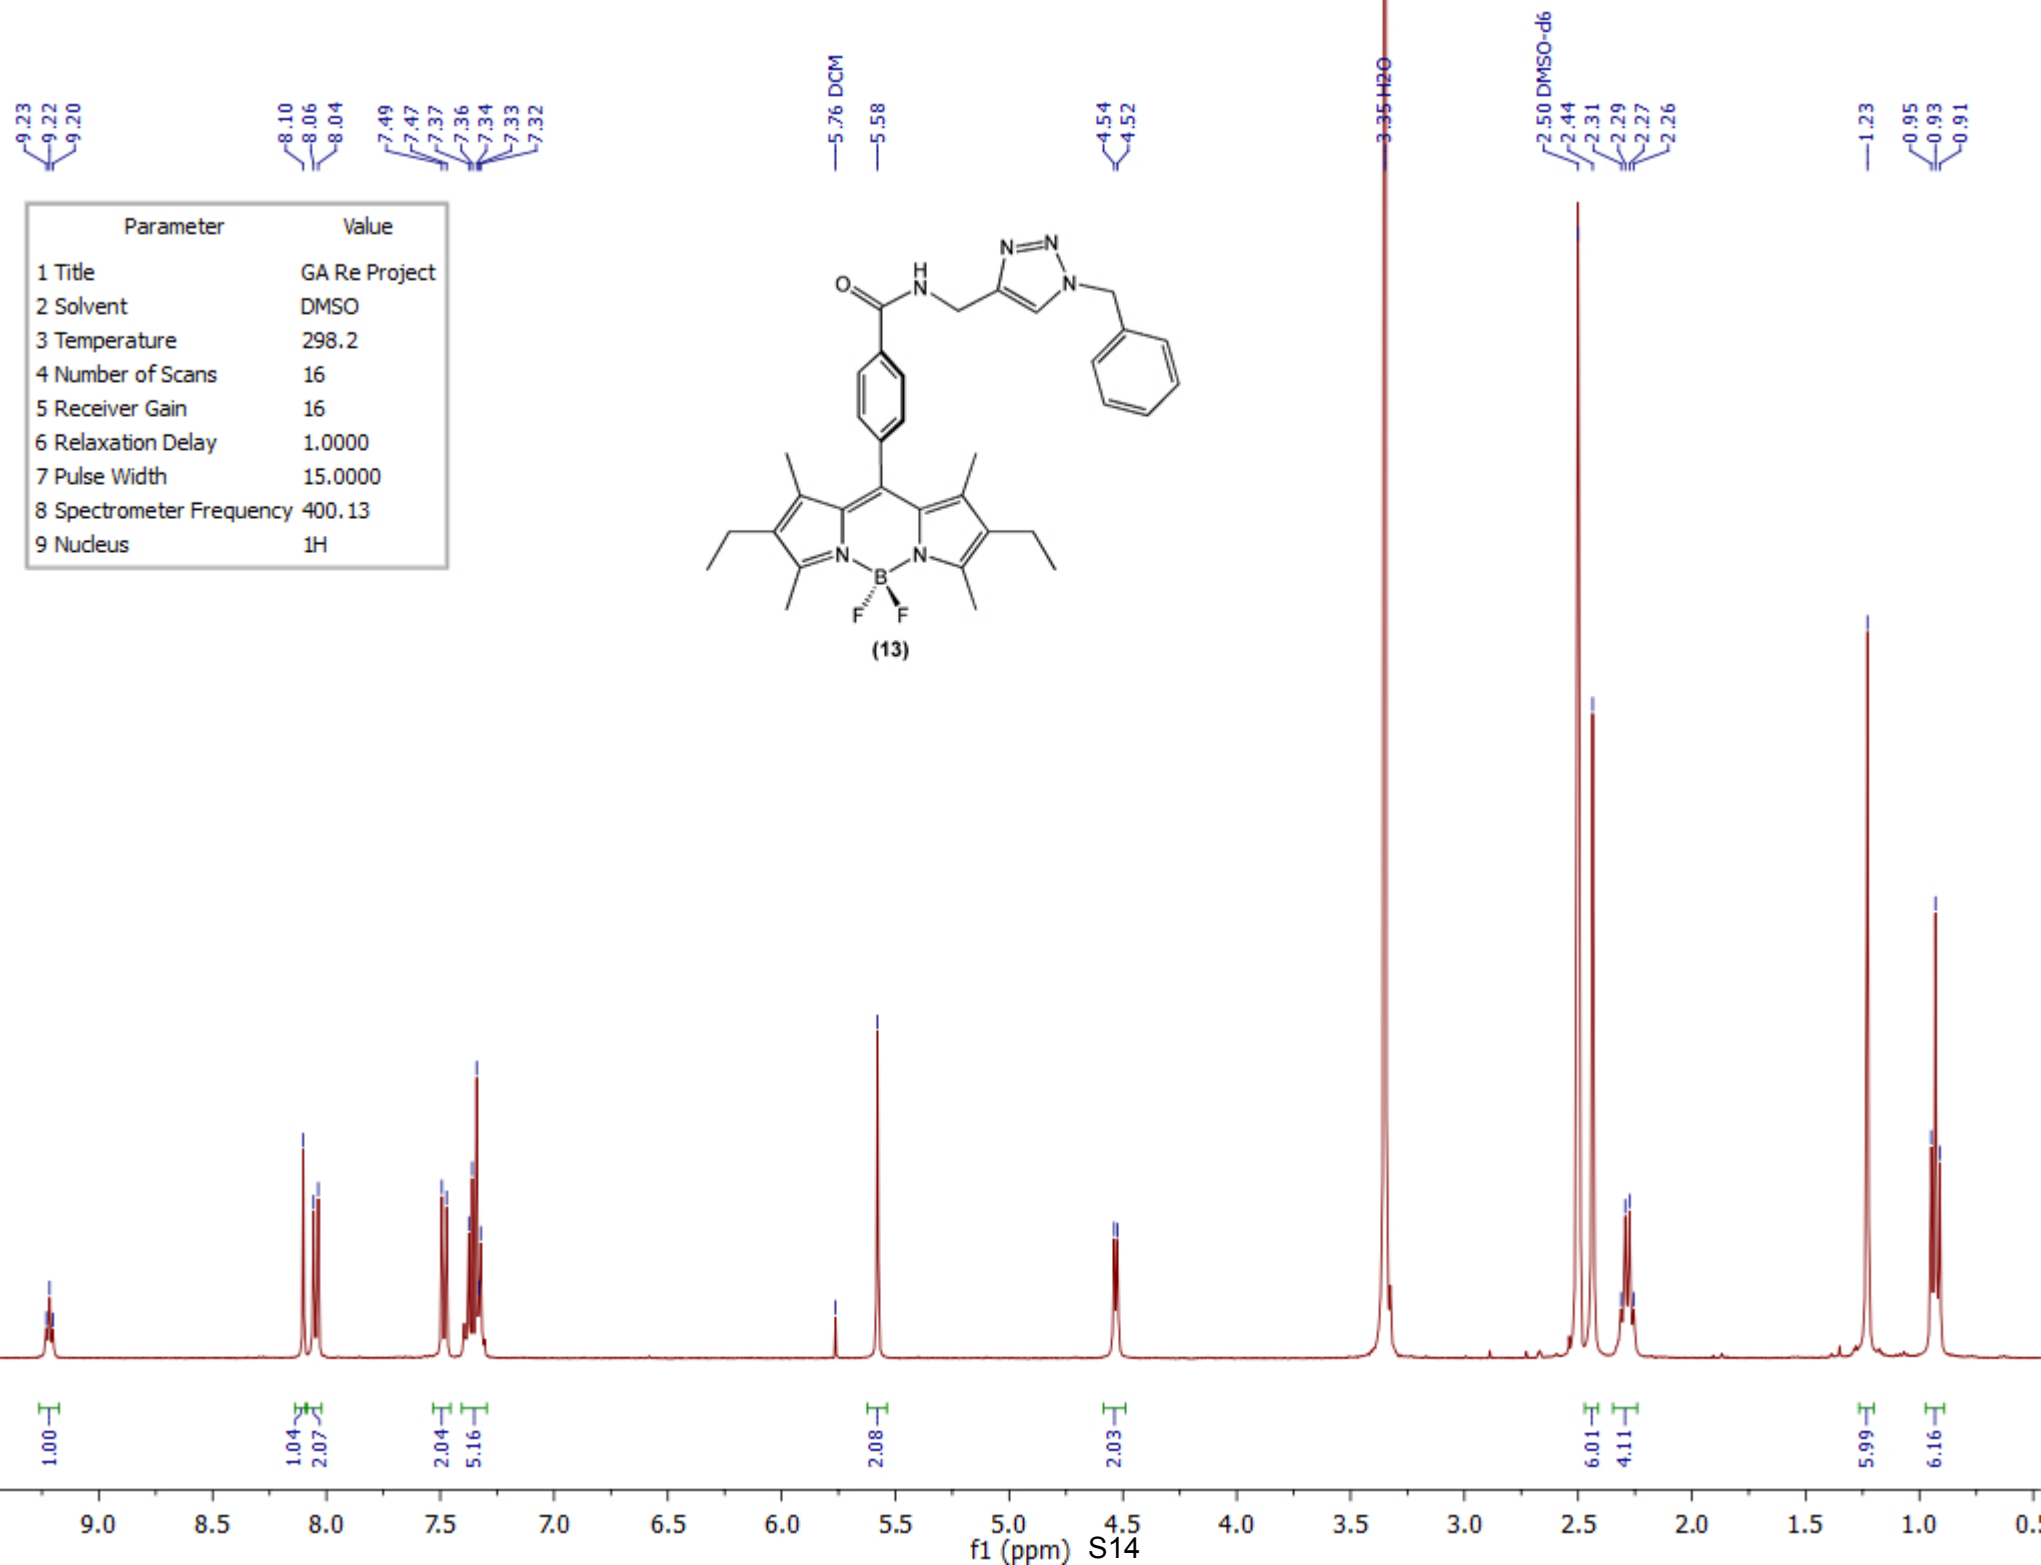

165.44  
 153.52  
 145.14  
 139.66  
 138.05  
 137.71  
 136.22  
 134.50  
 132.79  
 129.70  
 128.79  
 128.31  
 128.21  
 128.16  
 128.07  
 123.33

| Parameter                | Value         |
|--------------------------|---------------|
| 1 Title                  | GA Re Project |
| 2 Solvent                | DMSO          |
| 3 Temperature            | 298.2         |
| 4 Number of Scans        | 1024          |
| 5 Receiver Gain          | 512           |
| 6 Relaxation Delay       | 3.0000        |
| 7 Pulse Width            | 9.2500        |
| 8 Spectrometer Frequency | 100.61        |
| 9 Nucleus                | 13C           |

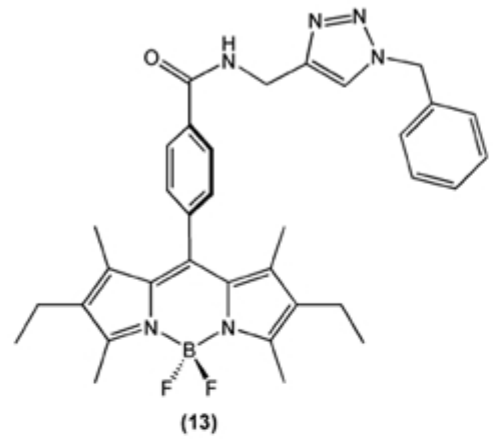

52.74

39.52 DMSO-d6

34.96

16.44  
 14.58  
 12.32  
 11.53

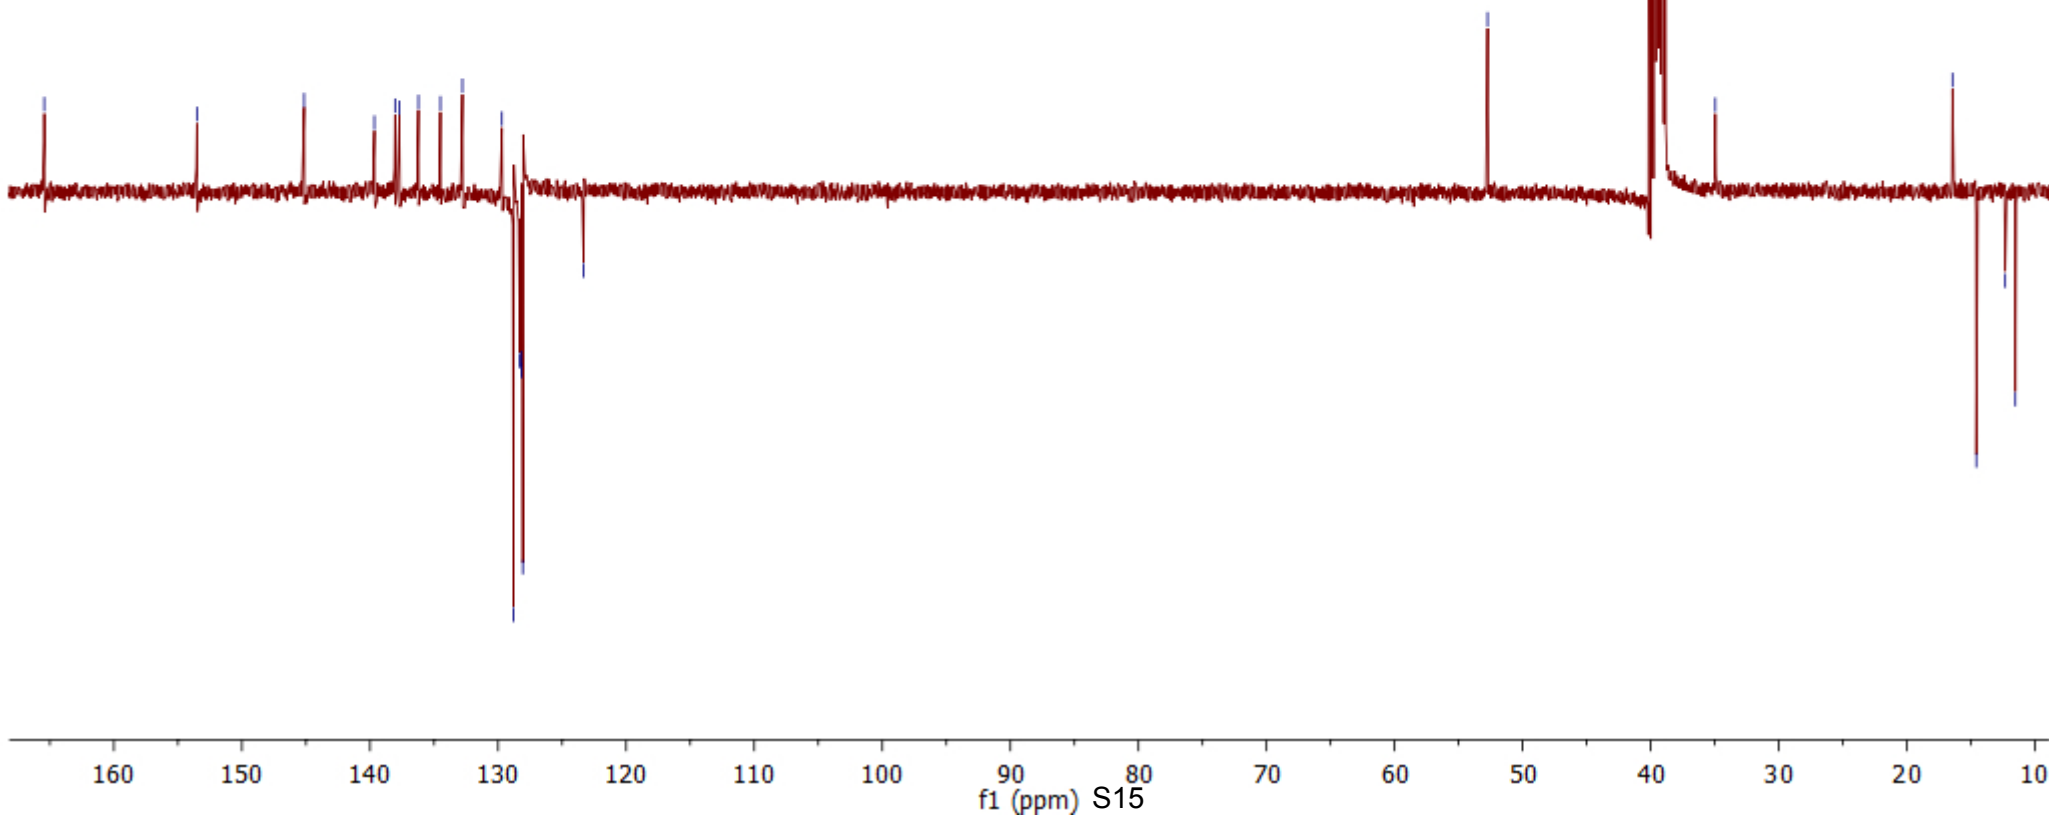

Supplement: NIHMS501709-supplement-2_si_001.pdf [file NIHMS501709-supplement-2_si_001.pdf]
